# Supplementary material
Source: publisher figshare collection journal article supplement (https://acs.figshare.com/ndownloader/files/4603819)
Supplement: Supplementary file 1 [file 4603819]

# Supporting Information

## From Hollow Nanosphere to Hollow Microsphere: Mild Buffer Provides Easy Access to Tunable Silica Structure

Jian Liu,<sup>†,‡</sup> Fengtao Fan,<sup>†,‡</sup> Zhaochi Feng,<sup>†</sup> Lei Zhang,<sup>†</sup> Shiyang Bai,<sup>†,‡</sup> Qihua Yang,<sup>\*,†</sup>

and Can Li<sup>\*,†</sup>

*State Key Laboratory of Catalysis, Dalian Institute of Chemical Physics, Chinese Academy of  
Sciences, 457 Zhongshan Road, Dalian 116023, China, and Graduate School of the Chinese  
Academy of Sciences, Beijing 100039, China*

**RECEIVED DATE** (to be automatically inserted after your manuscript is accepted if required  
according to the journal that you are submitting your paper to)

\* To whom correspondence should be addressed. E-mail: yangqh@dicp.ac.cn; canli@dicp.ac.cn.

Tel: 86-411-84379552; 86-411-84379070. Fax: 86-411-84694447. URL:

<http://www.hmm.dicp.ac.cn>; <http://www.canli.dicp.ac.cn>.

<sup>†</sup> Dalian Institute of Chemical Physics, Chinese Academy of Sciences

<sup>‡</sup> Graduate School of the Chinese Academy of Sciences

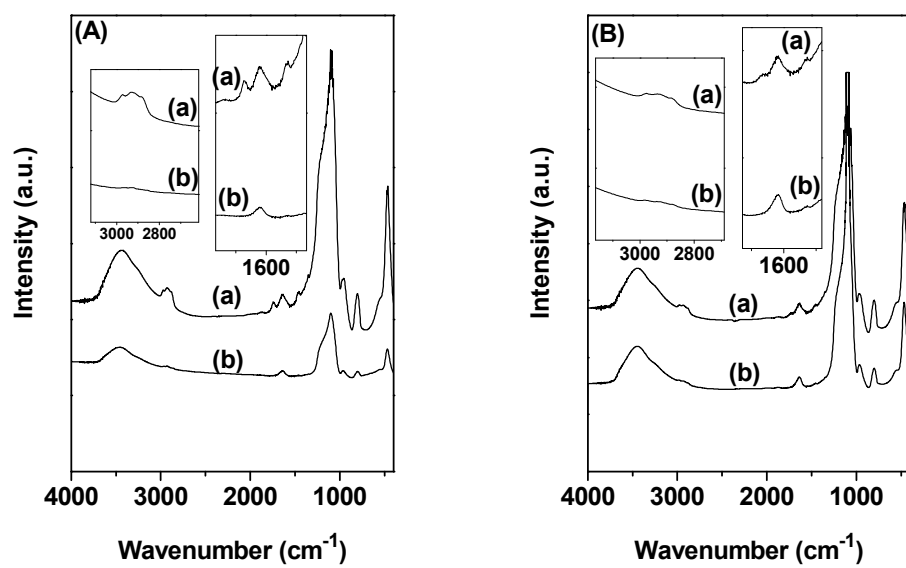

**Figure S1.** FT-IR spectra of the silica hollow nanosphere (SHN): (A) SHN; (B) SHN-1: (a) before extraction of the surfactant; (b) after extraction of the surfactant.

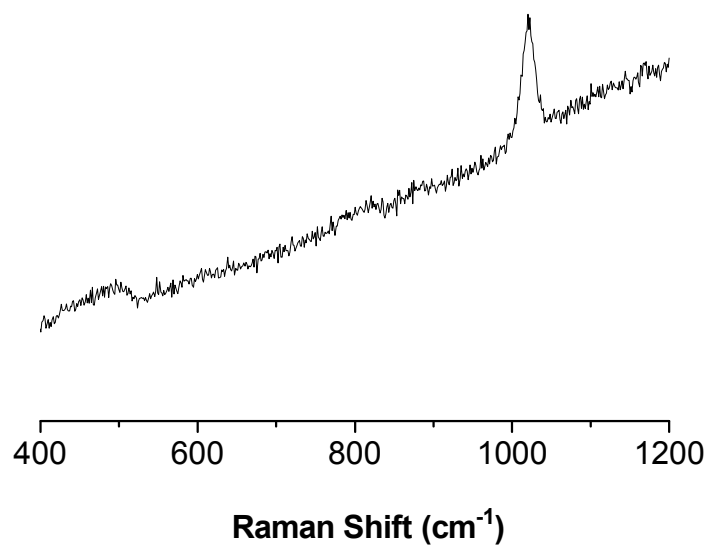

**Figure S2.** *In situ* Raman spectrum monitoring the hydrolysis of TMOS during the synthesis process of SHN (after 2 min stirring at 20 °C).
